# Supplementary material for: Two decades of antenatal and delivery care in Uganda: a cross-sectional study using Demographic and Health Surveys
Source: Springer Nature journal article supplement (doi:10.1186/s12913-018-3546-3), 2018-10-04

**Additional file 1: Figure S1. Timing of Uganda's health policies and major programmes, with focus on maternal/newborn health**

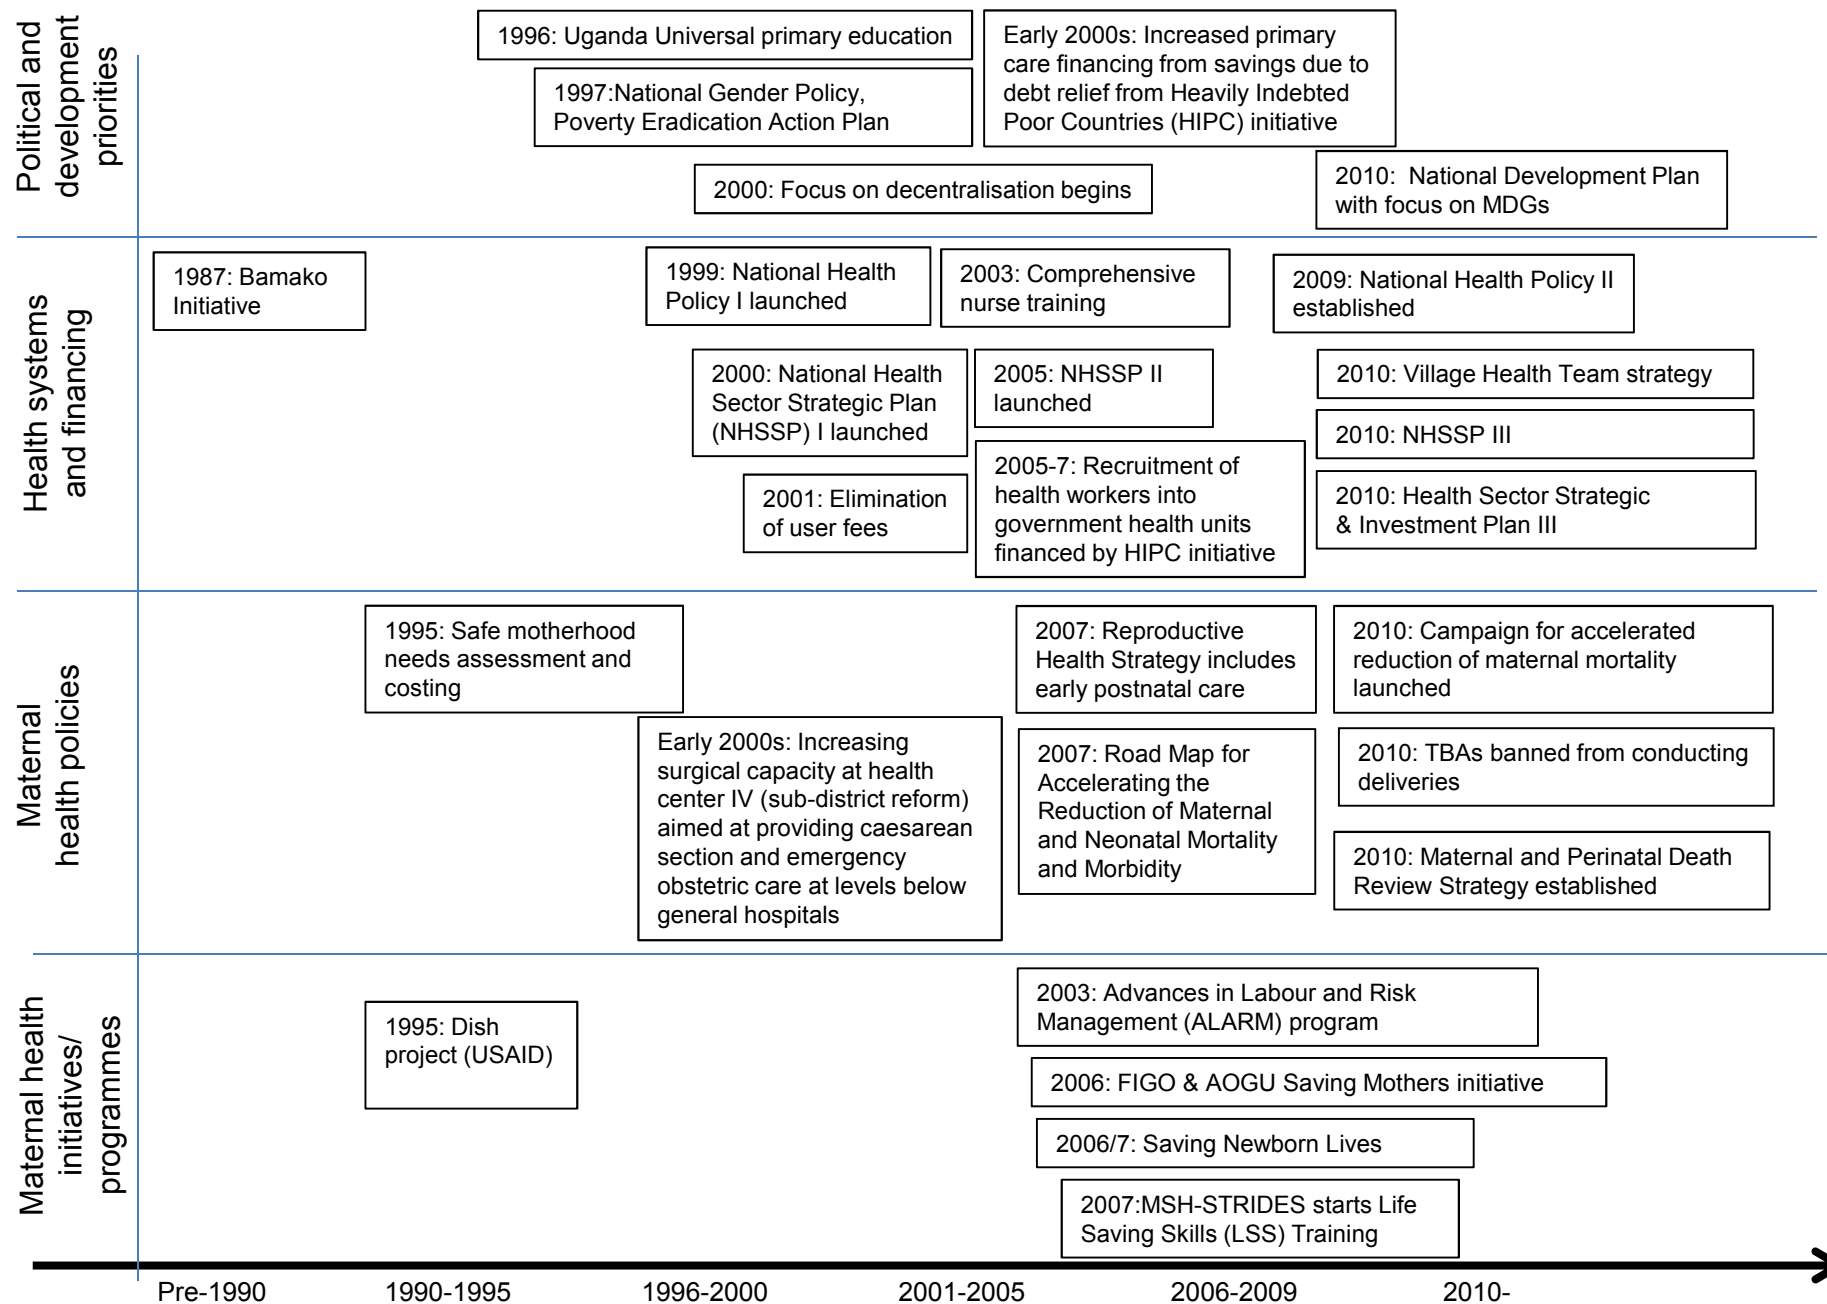

Supplement: MOESM1 [file 16173206]
