# Supplementary material for: Two decades of antenatal and delivery care in Uganda: a cross-sectional study using Demographic and Health Surveys
Source: Springer Nature journal article supplement (doi:10.1186/s12913-018-3546-3), 2018-10-04
Supplement: MOESM2 [file 16173206]

**Additional file 2: Table S1. Sample sizes (unweighted) used in analyses, by survey**

| Sample description                                                                                                 | Used in analysis presented in: | Survey year |       |       |       |
|--------------------------------------------------------------------------------------------------------------------|--------------------------------|-------------|-------|-------|-------|
|                                                                                                                    |                                | 1995        | 2001  | 2006  | 2011  |
| All women 15-49 surveyed                                                                                           | -                              | 7,070       | 7,246 | 8,531 | 8,674 |
| Total number of live births in recall period                                                                       | SM2                            | 7,145       | 7,115 | 8,369 | 7,879 |
| Women with 1+ live births in survey recall period (= number of most recent live births in survey recall period)    | Fig 1, Fig 2, Fig 3, SM2, SM4  | 4,291       | 4,252 | 5,004 | 4,909 |
| Women with 1+ live births in survey recall period who used 1+ ANC visits, at least one with a medical professional | Fig 4A, SM4                    | 3,698       | 3,954 | 4,722 | 4,683 |
| Women with 1+ live births in survey recall period who used 4+ ANC visits, at least one with a medical professional | Fig 5, SM4                     | 2,015       | 1,895 | 2,377 | 2,447 |
| Women with 1+ live births in survey recall period who delivered in a facility                                      | Fig 4B, Fig 6, SM2, SM4        | 1,748       | 1,918 | 2,229 | 3,078 |

**Additional file 2: Table S2. Comparison of estimates of deliveries from all births to most recent births, by survey**

| <b>% of births with facility delivery care</b> |          | <b>1995</b> | <b>2001</b> | <b>2006</b> | <b>2011</b> |
|------------------------------------------------|----------|-------------|-------------|-------------|-------------|
| Most recent live births in recall period       | Estimate | 33.6%       | 39.1%       | 44.7%       | 61.1%       |
|                                                | Lower CI | 30.3%       | 35.5%       | 41.8%       | 58.1%       |
|                                                | Upper CI | 37.1%       | 42.8%       | 47.7%       | 64.0%       |
| All births in recall period                    | Estimate | 29.1%       | 37.4%       | 41.3%       | 58.3%       |
|                                                | Lower CI | 26.4%       | 34.1%       | 38.9%       | 55.4%       |
|                                                | Upper CI | 32.1%       | 40.9%       | 43.8%       | 61.2%       |
| <b>% births by caesarean section</b>           |          | <b>1995</b> | <b>2001</b> | <b>2006</b> | <b>2011</b> |
| Most recent live births in recall period       | Estimate | 2.2%        | 3.0%        | 3.6%        | 6.1%        |
|                                                | Lower CI | 1.6%        | 2.5%        | 3.0%        | 5.3%        |
|                                                | Upper CI | 2.9%        | 3.6%        | 4.3%        | 7.1%        |
| All births in recall period                    | Estimate | 1.8%        | 2.5%        | 3.1%        | 5.3%        |
|                                                | Lower CI | 1.4%        | 2.1%        | 2.6%        | 4.5%        |
|                                                | Upper CI | 2.3%        | 3.0%        | 3.8%        | 6.1%        |

CI – 95% confidence interval

**Additional file 2: Table S3. Categorisation of ANC and delivery care locations into sector of provision, by survey**

| <b>Survey</b> | <b>Antenatal care locations</b>                                                                                                                                          | <b>Delivery care locations</b>                                                                                                                                                      |
|---------------|--------------------------------------------------------------------------------------------------------------------------------------------------------------------------|-------------------------------------------------------------------------------------------------------------------------------------------------------------------------------------|
| <b>1995</b>   | Not captured                                                                                                                                                             | Public sector: government hospital, government health center, government health unit, other public sector<br><br>Private sector: Private hospital/clinic, other private medical     |
| <b>2000</b>   | Not captured                                                                                                                                                             | Public sector: government hospital, government health center, government health/aid post, other public sector<br><br>Private sector: Private hospital/clinic, other private medical |
| <b>2006</b>   | Public sector: government hospital, government health center, government health post, other public<br><br>Private sector: Private hospital/clinic, other private medical |                                                                                                                                                                                     |
| <b>2011</b>   | Public sector: government hospital, government health center, other public sector<br><br>Private sector: Private hospital/clinic, other private                          |                                                                                                                                                                                     |

**Additional file 2: Table S4. Change in coverage and co-coverage indicators over time**

|                                                                           | Estimate (95%CI), by survey |                   |                   |                   | Change over time from earliest (1995, ANC sector: 2006) to most recent survey (2011) |                |
|---------------------------------------------------------------------------|-----------------------------|-------------------|-------------------|-------------------|--------------------------------------------------------------------------------------|----------------|
|                                                                           | 1995                        | 2001              | 2006              | 2011              | Absolute percentage point change                                                     | p-value (Chi2) |
| <b>% of most recent live births in survey recall period with</b>          |                             |                   |                   |                   |                                                                                      |                |
| 1+ ANC visits, at least one with a medical professional                   | 86.4% (84.8-87.8)           | 92.4% (91.3-93.4) | 94.1% (93.1-95.0) | 94.9% (93.8-95.7) | 8.5%                                                                                 | <0.001         |
| Received in the public sector*                                            | n/a                         | n/a               | 79.7% (77.1-82.1) | 85.8% (83.7-87.6) | 6.1%                                                                                 | <0.001         |
| Received in the private sector                                            | n/a                         | n/a               | 16.7% (14.5-19.2) | 10.6% (9.0-12.4)  | -6.1%                                                                                | <0.001         |
| Recommended ANC (4+ ANC visits, at least one with a medical professional) | 44.7% (42.3-47.3)           | 41.6% (39.1-44.1) | 46.6% (44.5-48.7) | 47.3% (45.2-49.4) | 2.6%                                                                                 | 0.134          |
| Facility delivery                                                         | 33.6% (30.3-37.1)           | 39.1% (35.5-42.8) | 44.7% (41.8-47.7) | 61.1% (58.1-64.0) | 27.5%                                                                                | <0.001         |
| Received in the public sector                                             | 57.9% (53.5-62.2)           | 60.4% (56.2-64.5) | 71.6% (68.2-74.8) | 74.9% (71.9-77.7) | 17.0%                                                                                | <0.001         |
| Received in the private sector                                            | 42.1% (37.8-46.5)           | 39.6% (35.5-43.8) | 28.4% (25.2-31.8) | 25.1% (22.3-28.1) | -17.0%                                                                               | <0.001         |
| Caesarean section                                                         | 2.2% (1.6-2.9)              | 3.0% (2.5-3.6)    | 3.6% (3.0-4.3)    | 6.1% (5.3-7.1)    | 3.9%                                                                                 | <0.001         |
| Complete maternal care                                                    | 21.9% (19.4-24.6)           | 22.7% (20.3-25.4) | 26.3% (24.3-28.4) | 32.9% (30.7-35.2) | 11.0%                                                                                | <0.001         |

\* Public and private categories do not sum to 100% due to other two categories (public/private and home/other locations) as shown on Figure 4. The sum of these two categories remained the same between 2006 and 2011 (3.6%), therefore change over time is solely due to changes in the use of public versus private sector, as shown here.

**Additional file 2: Table S5. Differences in the extent of socio-economic inequalities over time**

| Socio-economic characteristics*                                   | Earliest survey (1995)               |                | Most recent survey (2011)            |                |
|-------------------------------------------------------------------|--------------------------------------|----------------|--------------------------------------|----------------|
|                                                                   | Absolute percentage point difference | p-value (Chi2) | Absolute percentage point difference | p-value (Chi2) |
| <b>Wealth quintile (poorest versus richest)</b>                   |                                      |                |                                      |                |
| 1+ ANC visits, at least one with a medical professional           | 4.4%                                 | 0.031          | 3.2%                                 | 0.007          |
| Recommended ANC                                                   | 22.9%                                | <0.001         | 16.2%                                | <0.001         |
| Facility delivery                                                 | 43.5%                                | <0.001         | 45.2%                                | <0.001         |
| Caesarean section                                                 | 5.5%                                 | <0.001         | 10.5%                                | <0.001         |
| Complete maternal care                                            | 35.7%                                | <0.001         | 33.4%                                | <0.001         |
| <b>Education level (no education versus secondary and higher)</b> |                                      |                |                                      |                |
| 1+ ANC visits, at least one with a medical professional           | 10.5%                                | <0.001         | 4.3%                                 | 0.004          |
| Recommended ANC                                                   | 31.4%                                | <0.001         | 11.0%                                | <0.001         |
| Facility delivery                                                 | 47.0%                                | <0.001         | 41.7%                                | <0.001         |
| Caesarean section                                                 | 2.2%                                 | 0.007          | 8.2%                                 | <0.001         |
| Complete maternal care                                            | 41.4%                                | <0.001         | 26.3%                                | <0.001         |
| <b>Residence (rural versus urban)</b>                             |                                      |                |                                      |                |
| 1+ ANC visits, at least one with a medical professional           | -0.7%                                | 0.668          | 3.0%                                 | 0.010          |
| Recommended ANC                                                   | 19.1%                                | <0.001         | 11.6%                                | <0.001         |
| Facility delivery                                                 | 40.5%                                | <0.001         | 35.8%                                | <0.001         |
| Caesarean section                                                 | 4.0%                                 | <0.001         | 9.7%                                 | <0.001         |
| Complete maternal care                                            | 33.4%                                | <0.001         | 23.6%                                | <0.001         |

\* Differences by geographic zone are not shown because categories with lowest and highest coverage are not consistently the same across time and indicators.
